# Supplementary material for: Changes in biomass burning, wetland extent, or agriculture drive atmospheric NH 3 trends in select African regions
Source: Copernicus journal article supplement (doi:10.5194/acp-21-16277-2021), 2021-11-16
Supplement: Supplementary file 1 [file acp-21-16277-2021-supplement.pdf]

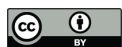

*Supplement of*

## **Changes in biomass burning, wetland extent, or agriculture drive atmospheric NH<sub>3</sub> trends in select African regions**

**Jonathan E. Hickman et al.**

*Correspondence to:* Jonathan E. Hickman ([jonathan.e.hickman@nasa.gov](mailto:jonathan.e.hickman@nasa.gov))

The copyright of individual parts of the supplement might differ from the article licence.

## **Contents of this file**

Text S1 to S2

Figures S1 to S20

Table S1

## **Introduction**

The supporting information contains four main categories of supporting information. First, Figures S1-S5, S7, S11, and S20 represent additional continental-scale figures supporting analysis in the main text of the document. Figure S6 provides supporting analysis of trends in West Africa. Text S1 and Figures S8-S10 and S12 provides supporting analysis of trends in South Sudan, including the potential effects of conflict in South Sudan. Figures S13-S18 provide supporting analysis of trends in the Lake Victoria region. Figure S19, Table S1, and Text S2 provide supporting analysis of national-scale relationships. Collection, generation, processing, and analysis of data are described either in the main document or in the relevant supplementary text section.

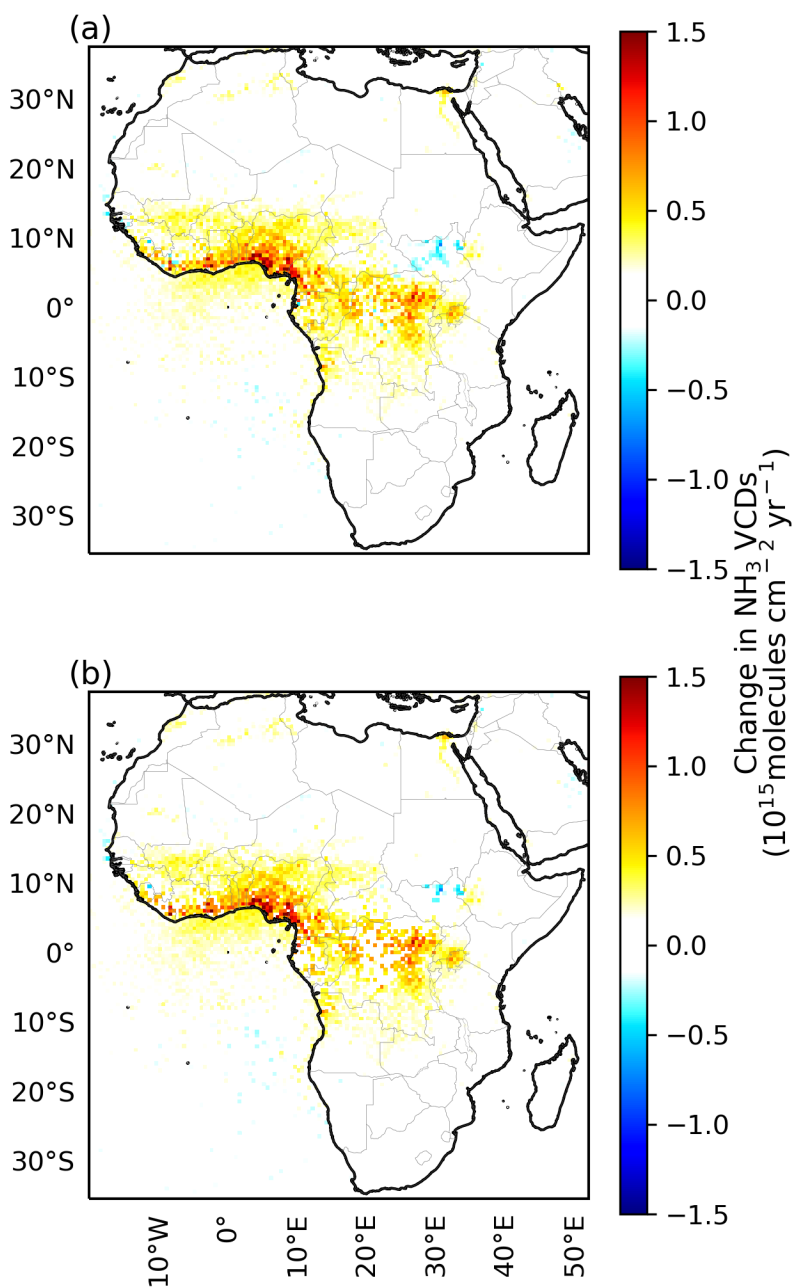

**Figure S1.** Trend in atmospheric  $\text{NH}_3$  VCDs from IASI for the period 2008 through 2018 where trends meet the significance threshold of (a)  $p=0.05$  or (b)  $p=0.20$ .

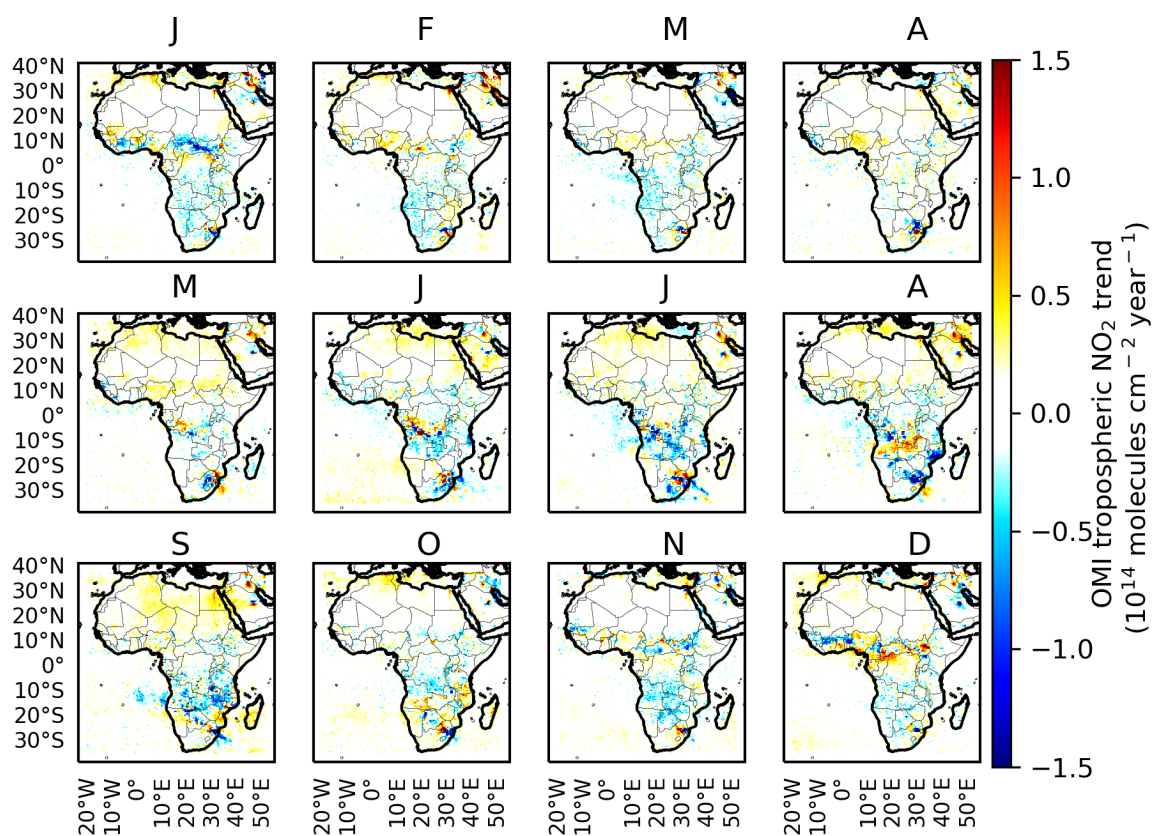

**Figure S2.** Change in mean monthly atmospheric OMI NO<sub>2</sub> VCDs for the period 2008 through 2018.

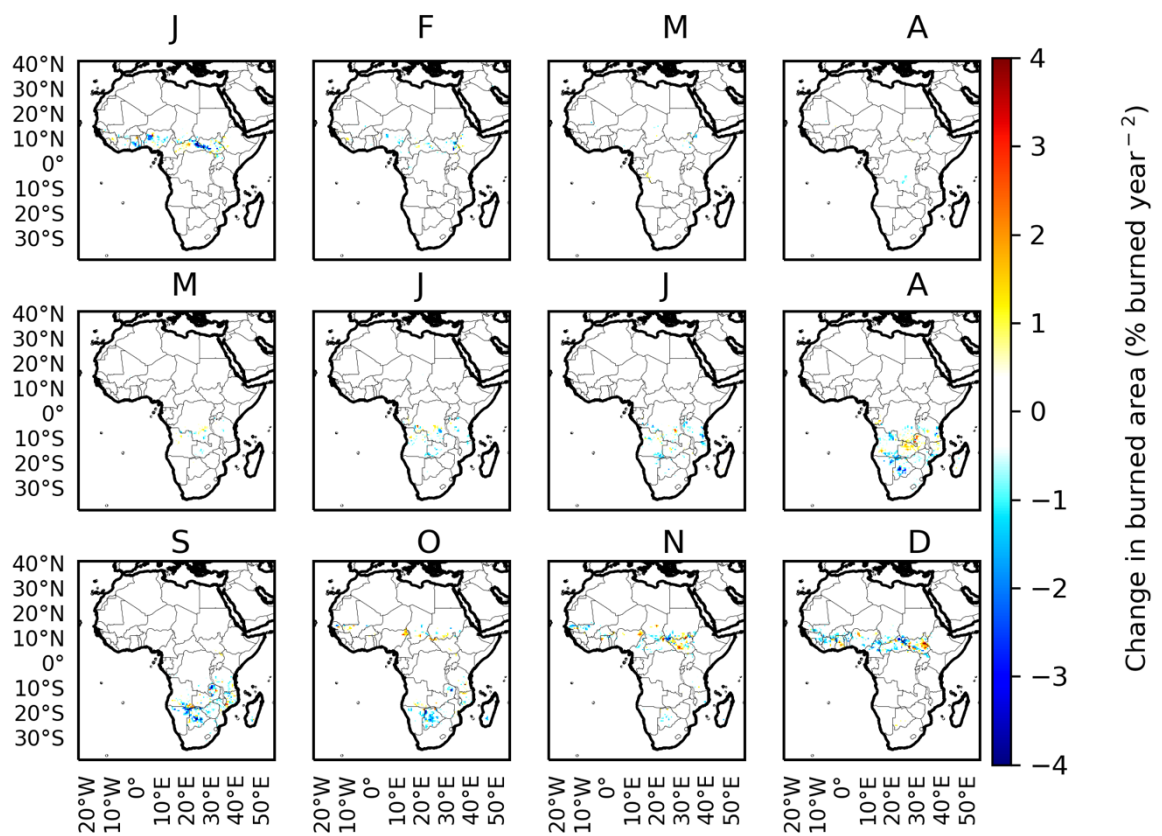

**Figure S3.** Change in mean monthly atmospheric MODIS burned area for the period 2008 through 2018.

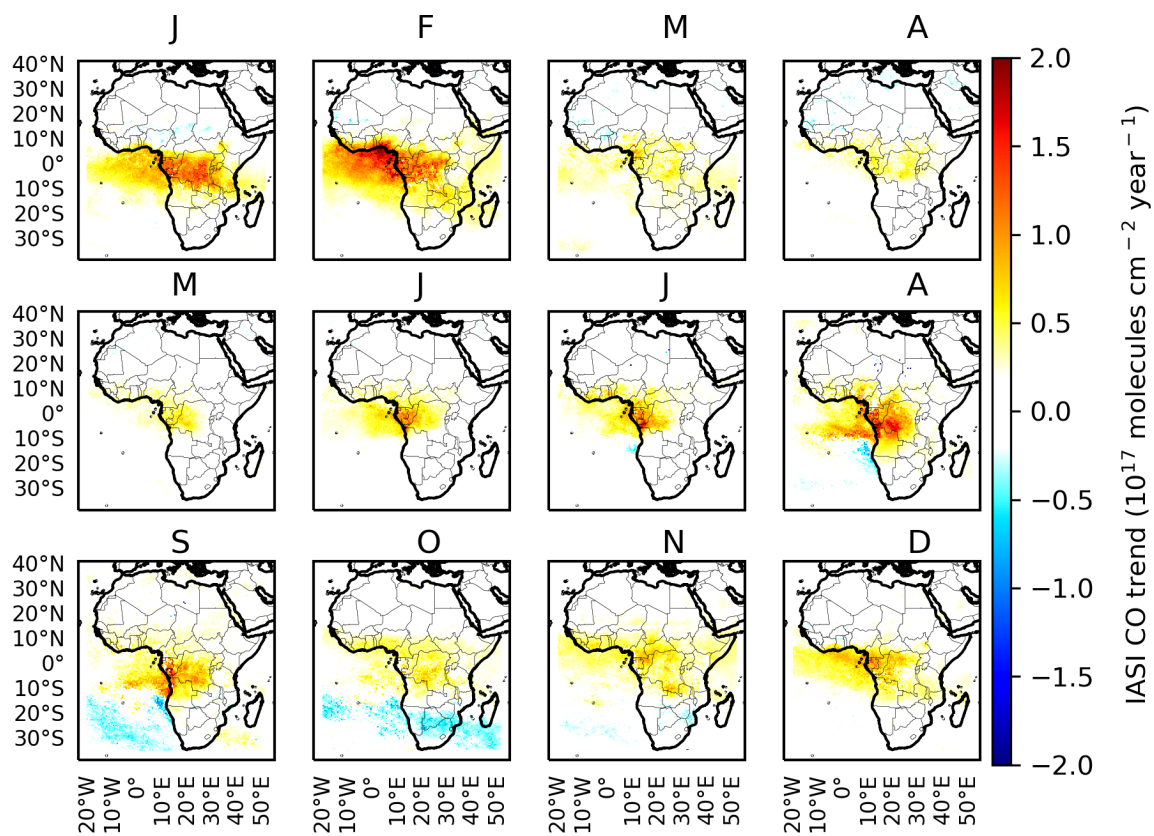

**Figure S4.** Change in mean monthly atmospheric CO VCDs for the period 2008 through 2018.

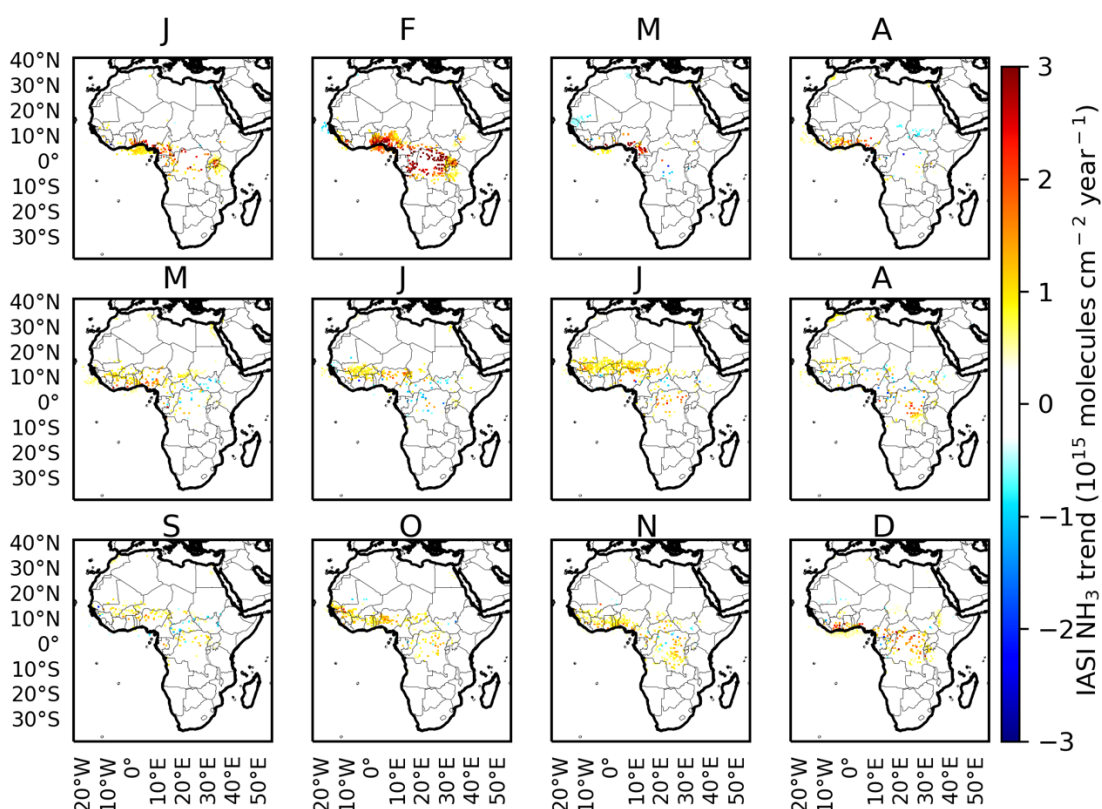

**Figure S5.** Change in mean monthly atmospheric  $\text{NH}_3$  VCDs for the period 2008 through 2018 where the relationship is significant at  $p=0.05$ . Grid cells where mean annual  $\text{NH}_3$  VCDs for the entire period are under  $5 \times 10^{15}$  molecules  $\text{cm}^{-2}$  are not displayed.

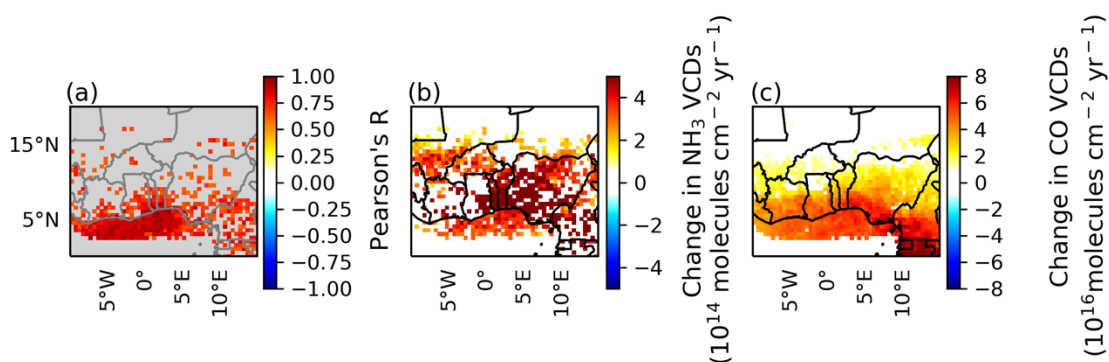

**Figure S6.** Correlation coefficient for the relationship between mean annual CO and  $\text{NH}_3$  VCDs (a), changes in  $\text{NH}_3$  VCDs (b) and changes in CO VCDs (c) over 2008 through 2018 in West Africa where the relationship is significant at  $p=0.05$ . Grid cells where mean annual  $\text{NH}_3$  VCDs for the entire period are under  $5 \times 10^{15}$  molecules  $\text{cm}^{-2}$  are not displayed.



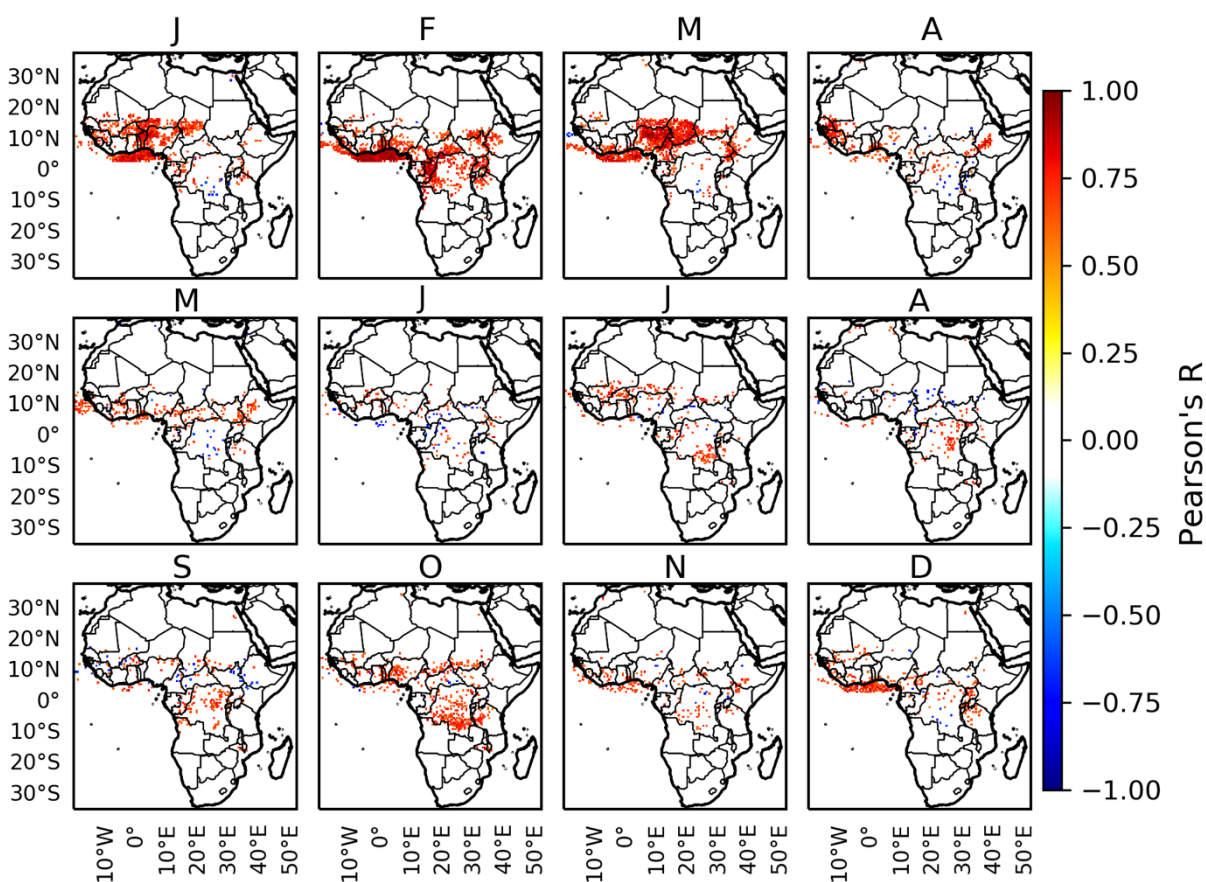

**Figure S7.** Correlation coefficient for the relationship between mean annual CO and NH<sub>3</sub> VCDs over 2008 through 2018 where the relationship is significant at  $P=0.05$ . Regions where mean annual NH<sub>3</sub> VCDs for the entire period are under  $5 \times 10^{15}$  molecules  $\text{cm}^{-2}$  are screened out.



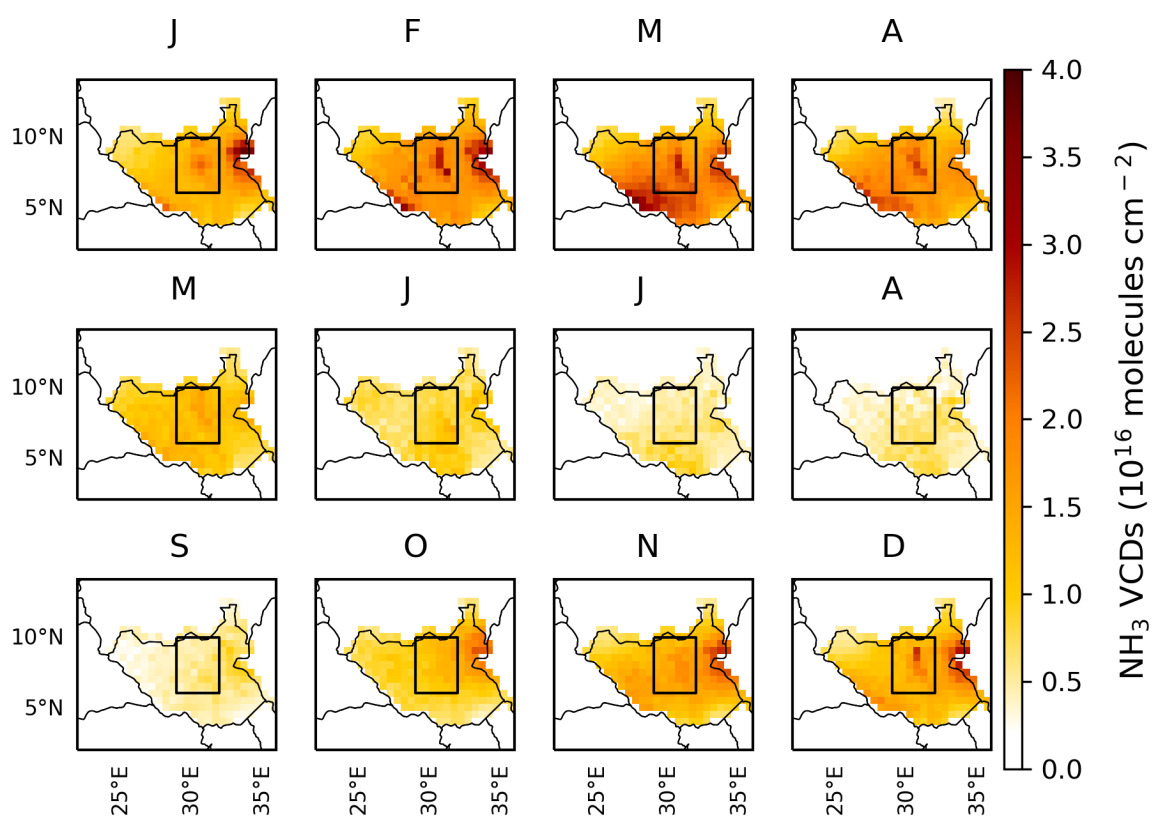

**Figure S8.** Mean monthly atmospheric  $\text{NH}_3$  VCDs over South Sudan; mean is for the period 2008 through 2018.

### **Text S1. South Sudan conflict**

In 2013, a civil conflict emerged in South Sudan that was ultimately responsible for the displacement of millions of people (Global Internal Displacement Monitoring Centre, 2020; World Bank, 2019) and the disruption of livestock migration patterns (Idris, 2018). These disruptions could be expected to lead to a decrease in  $\text{NH}_3$  VCDs if they result in lower rates of fertilizer use and a decrease in livestock and livestock-related emissions. Although there are some spatial correspondences between the location of conflict events and changes in  $\text{NH}_3$  VCDs (Fig. S7), the change in  $\text{NH}_3$  VCDs appears already to have been underway years in advance of the onset of conflict (Fig. S6, Fig. S8), suggesting that other factors are responsible for the interannual variation. Displacement spiked in 2014, the year that  $\text{NH}_3$  VCDs were at their lowest values. It is possible that this displacement and the associated conflict contributed to the low  $\text{NH}_3$  values, but 2014 was the year of the largest Sudd extent during February through May, which would also be expected to reduce  $\text{NH}_3$  emissions. The number of refugees and internally displaced people increased substantially from 2013 through 2017, a period during which the dry season flooded extent of the Sudd decreased, and  $\text{NH}_3$  VCDs increased (Fig. S8). Maps of trends and annual mean  $\text{NH}_3$  VCDs over the IASI lifetime reveal that most interannual variability occurs over the Sudd (Fig. S7, S10). The strong spatial relationship between the Sudd and interannual  $\text{NH}_3$  variability suggests that Sudd flooded extent is likely the main factor responsible for the interannual variation in  $\text{NH}_3$  VCDs during this period, and the overall trend we observe for 2008 through 2017.

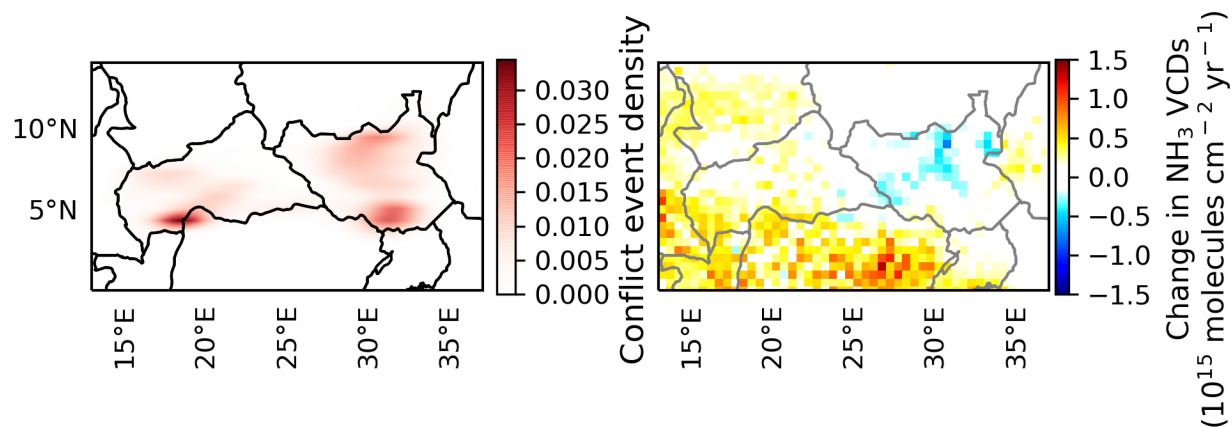

**Figure S9.** Kernel density estimate of conflict events (left) and change in NH<sub>3</sub> concentrations (right) between 2008 and 2018. Conflict data are from the Armed Conflict Location and Event Project (Raleigh et al., 2010; acleddata.com), and includes both violent and non-violent events.

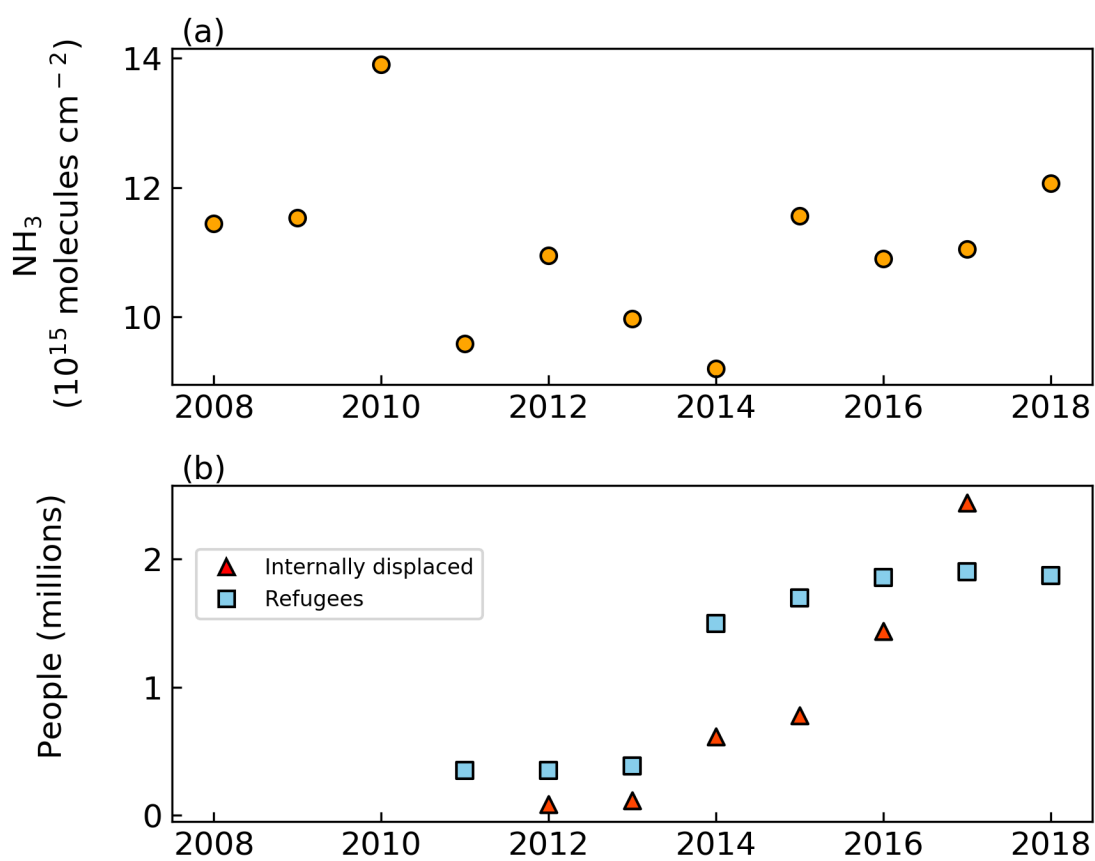

**Figure S10.** Mean annual  $\text{NH}_3$  VCDs (a) and mean annual refugees and internally displaced people (b) in South Sudan over the 2008-2018 period for years where data are available.

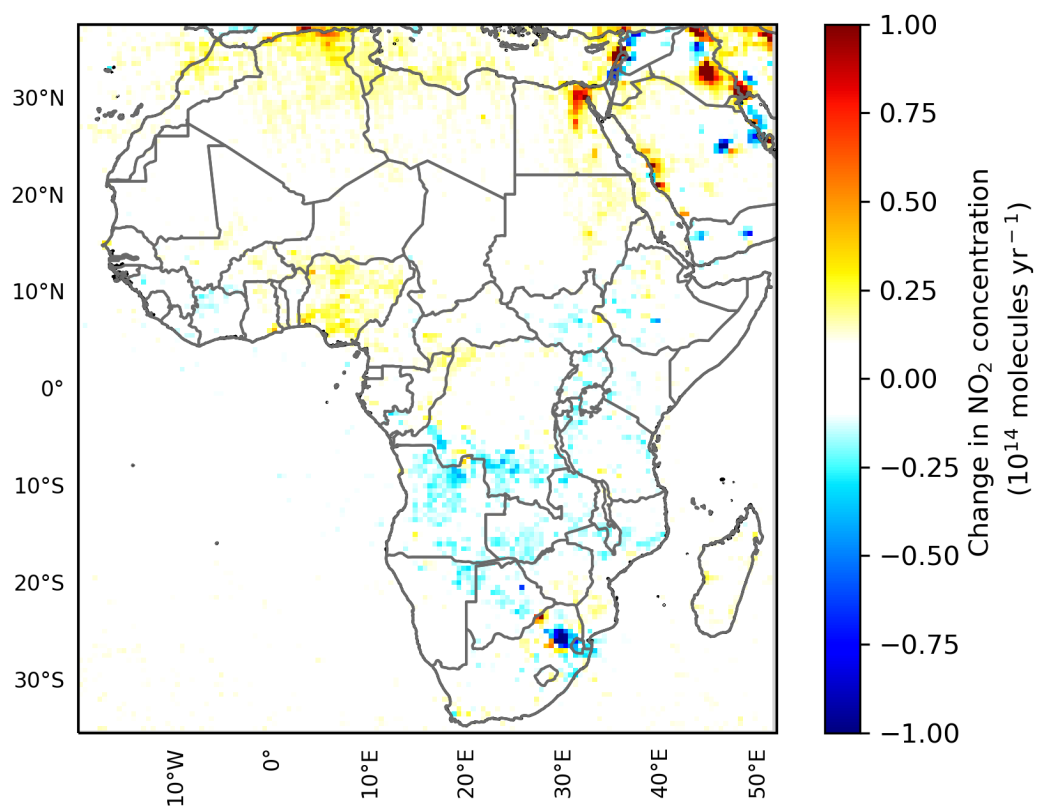

**Figure S11.** Change in mean annual tropospheric NO<sub>2</sub> VCDs over Africa, 2008 through 2018.

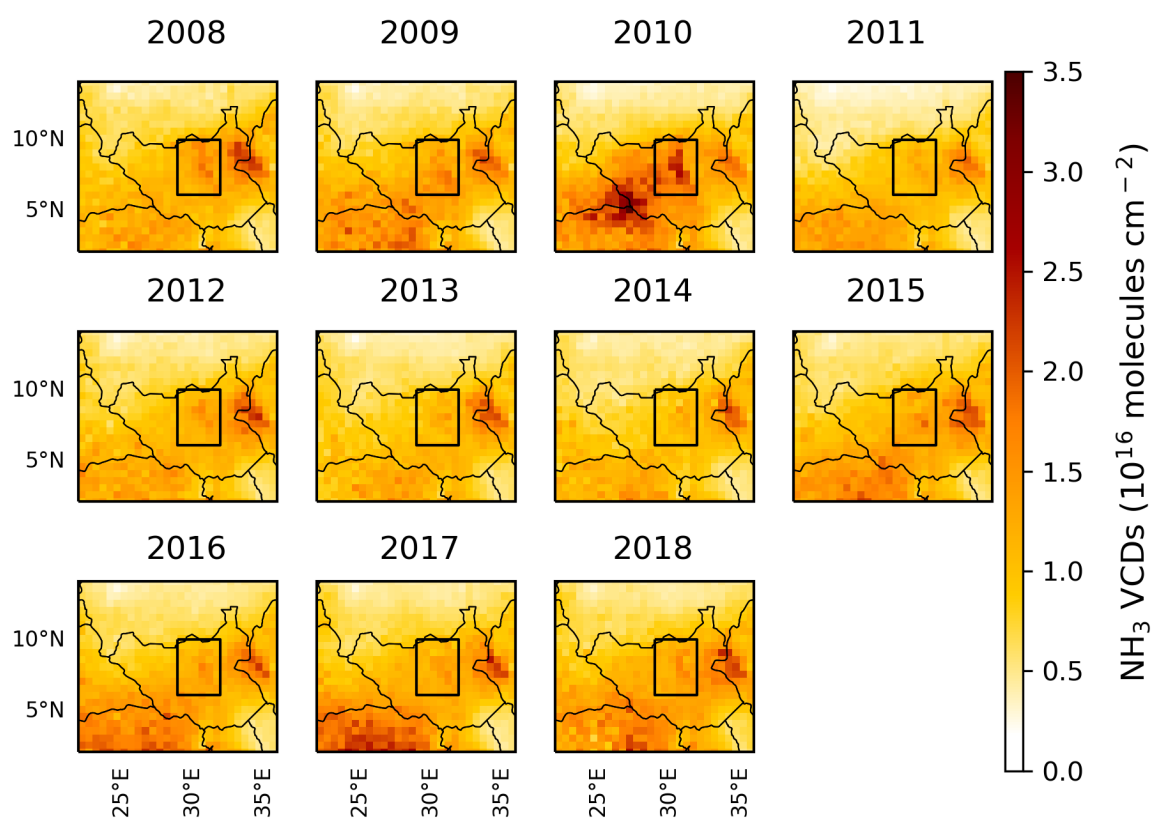

**Figure S12.** Mean annual atmospheric  $\text{NH}_3$  VCDs over South Sudan for 2008 through 2018. The Sudd is highlighted in the black box.

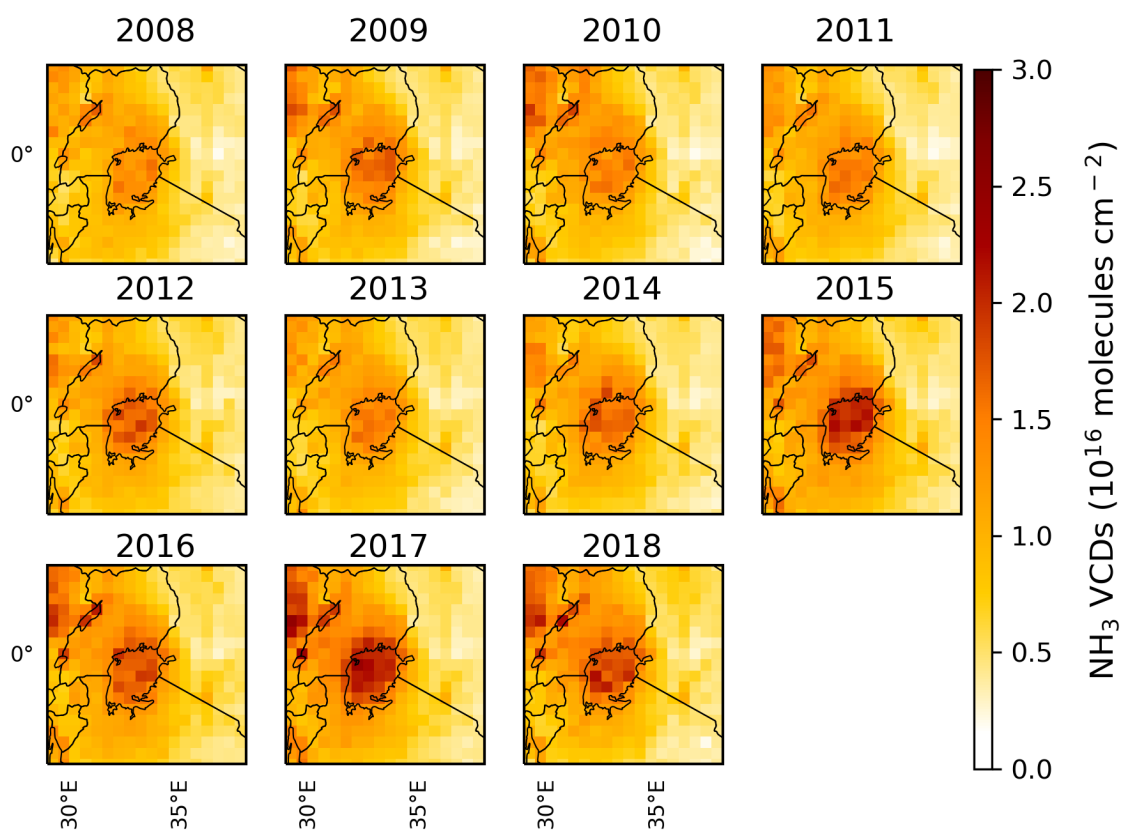

**Figure S13.** Mean annual atmospheric  $\text{NH}_3$  VCDs over the Lake Victoria region for 2008 through 2018.



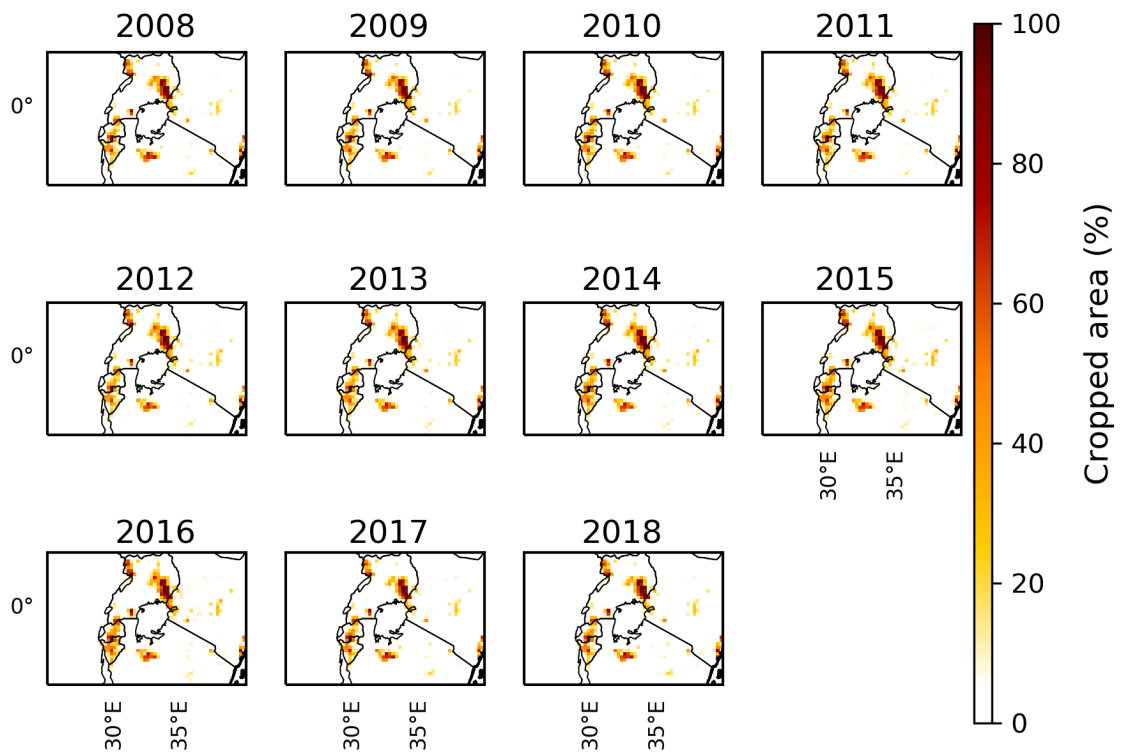

**Figure S14.** Cropped area in the Lake Victoria region for 2008 through 2018.

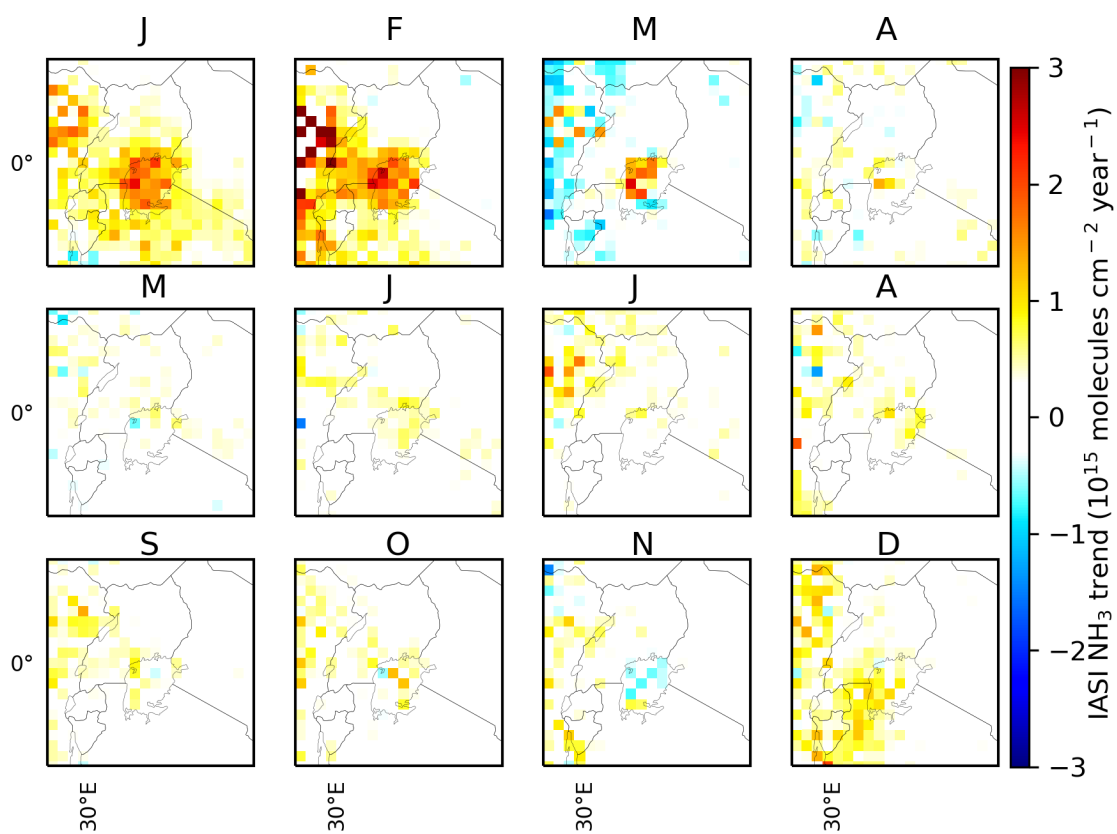

**Figure S15.** Change in mean monthly atmospheric  $\text{NH}_3$  VCDs for the period 2008 through 2018.

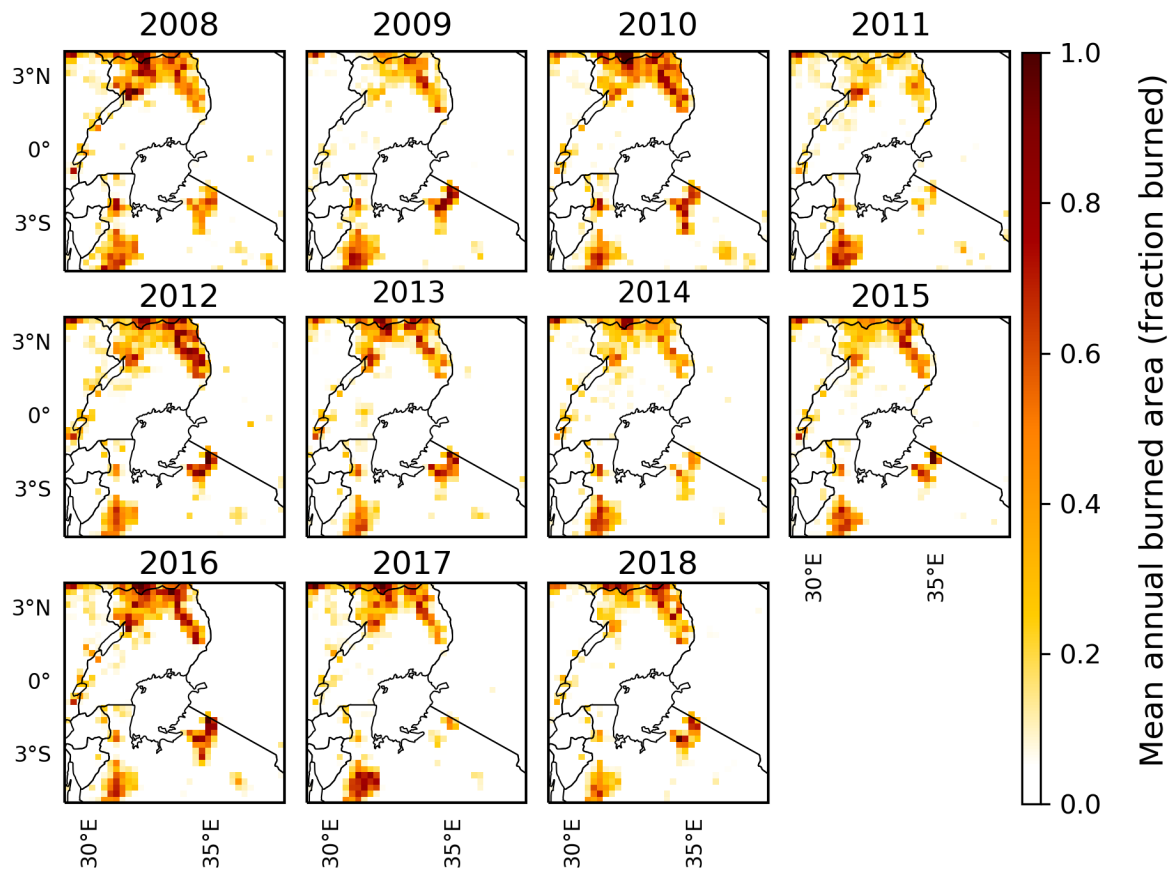

**Figure S16.** Total annual burned area in the Lake Victoria region for 2008 through 2018.

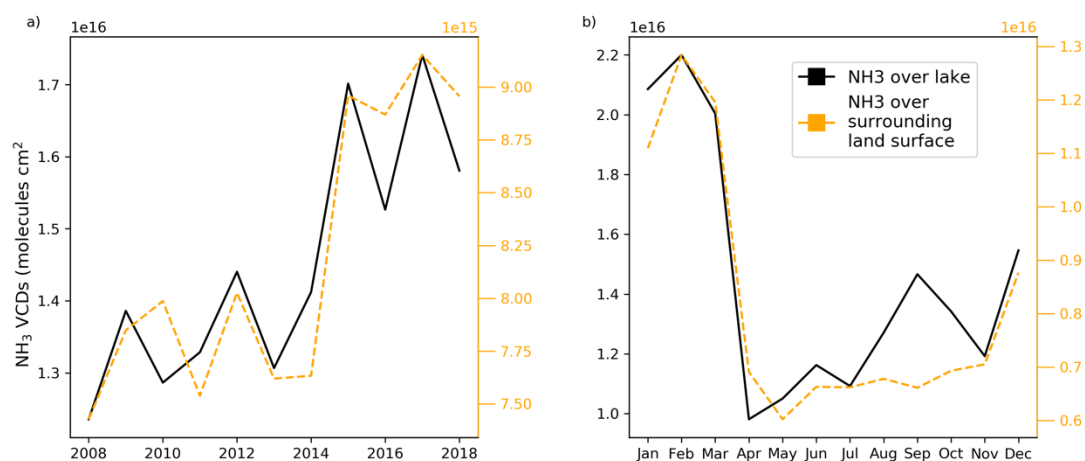

**Figure S17.** Mean annual (a) and mean monthly (b)  $\text{NH}_3$  VCDs over Lake Victoria and the surrounding land area, 2008-2018.

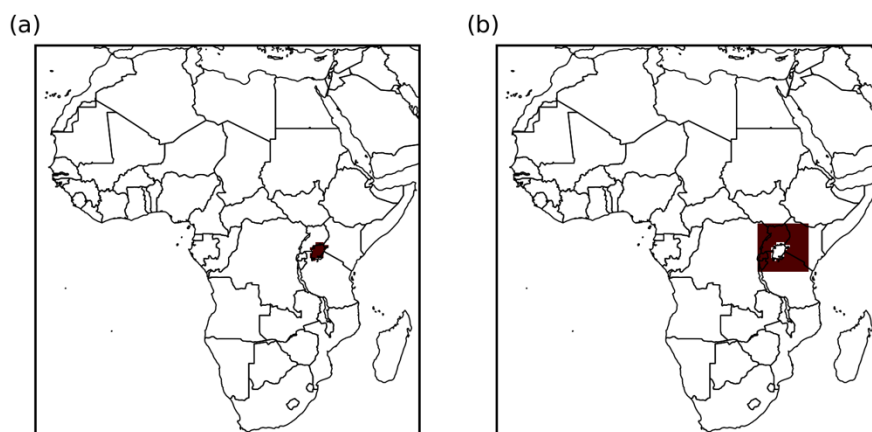

**Figure S18.** Masks used in time series analysis of  $\text{NH}_3$  over Lake Victoria (a) and over the surrounding land surface (b).

## **Text S2. Additional national-scale relationships**

**Temperature:** Mean temperature changes are small—less than 0.015% yr<sup>-1</sup> with standard errors that bracket zero; the values are too small to appear on Figure S19. Although they are nearly significantly different among bins at  $p=0.11$ , they do not exhibit a relationship with NH<sub>3</sub> at the country scale in our binned analysis: the annual rate of warming is lowest in the middle bin (0.006 C yr<sup>-1</sup>) and roughly equal in the bottom and top bins (0.013 C yr<sup>-1</sup> and 0.017 C yr<sup>-1</sup>, respectively).

**NO<sub>2</sub>:** NO<sub>2</sub> exhibits marginal increases in each bin, which appear to decrease across bins, but these differences are not significant (Fig. S19;  $p=0.55$ ). It remains possible that changes in NO<sub>2</sub> emissions may influence NH<sub>3</sub> trends by decreasing the lifetime of NH<sub>3</sub> in the atmosphere, which would be evident as a negative correlation between the two species. In examining spatial relationships between the two gases there is a lot of noise (Fig. S20), but in Nigeria, South Sudan, the Nile Region, and the North African coast, we observe positive correlations, suggestive that changes in NH<sub>3</sub> VCDs in those regions are not the result of reactions with NO<sub>2</sub>. Instead, the fact that trends of both gases have the same sign is consistent with changes in emissions being responsible for the trends.

**SO<sub>2</sub>:** As with NO<sub>2</sub>, SO<sub>2</sub> may be expected to decrease the lifetime of NH<sub>3</sub>. However, in our binned analysis, SO<sub>2</sub> did not vary among bins (Fig. S19;  $p=0.98$ ). In addition, NH<sub>3</sub> and SO<sub>2</sub> may vary increase in parallel, suggesting that chemistry involving SO<sub>2</sub> does not make an important contribution to the observed NH<sub>3</sub> trends. Outside of South Africa, variation in SO<sub>2</sub> emissions in sub-Saharan Africa are largely related to volcanic emissions. During the period of our analyses, emissions from volcanoes in eastern Democratic Republic of Congo and Eritrea play particularly important roles in interannual SO<sub>2</sub> variability. A 2011 eruption in Eritrea results in an overall decline in SO<sub>2</sub> concentrations in the region in our analysis. In South Africa, SO<sub>2</sub> emissions from an array of coal fired power plants in the highveld have declined over the period of our analyses. However, the variation in SO<sub>2</sub> VCDs is not spatially related to variation in NH<sub>3</sub> VCDs, which are also small in the continental context. Note that we exclude Lesotho from these analyses, which experienced a 1000% rate of increase in SO<sub>2</sub> VCDs from 2005 to 2018; including Lesotho results in a very high mean rate of SO<sub>2</sub> increase in the middle bin.

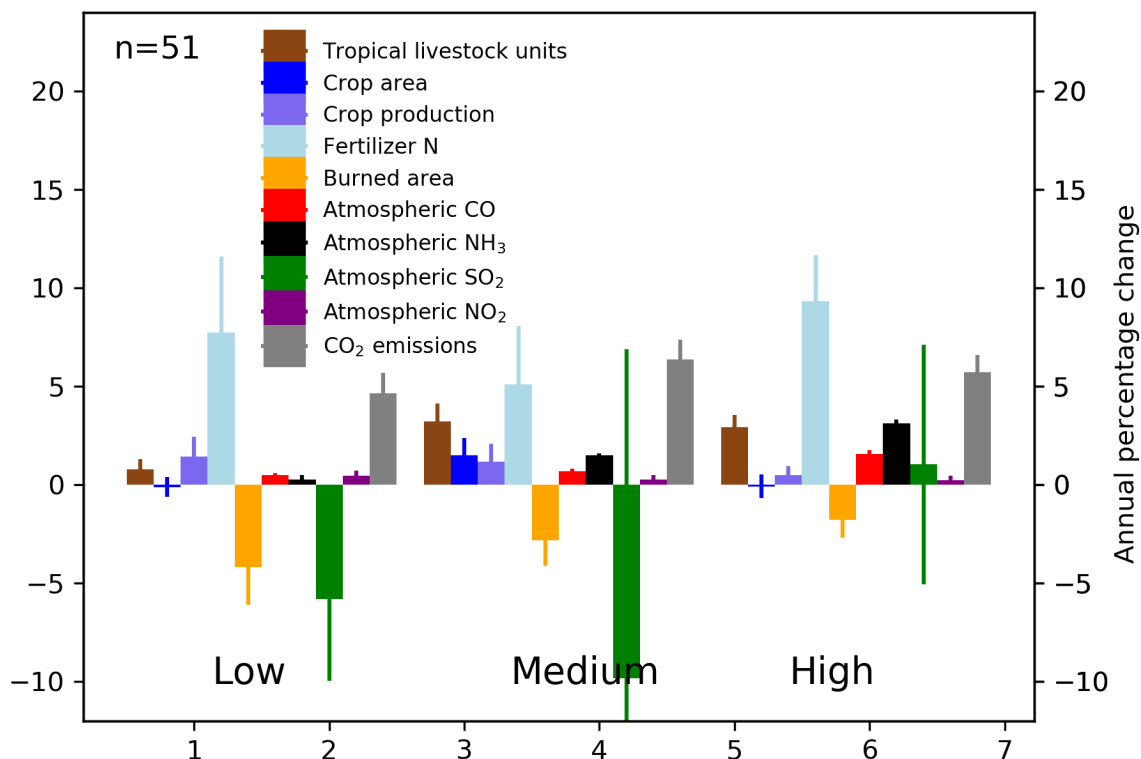

**Figure S19.** Annual percentage changes in national mean annual Tropical Livestock Units, crop area, crop yield, fertilizer N use, burned area, CO VCDs,  $\text{NH}_3$  VCDs,  $\text{SO}_2$  VCDs,  $\text{NO}_2$  VCDs, and  $\text{CO}_2$  emissions for African countries with low, medium, or high rates of  $\text{NH}_3$  VCD change for the period 2008-2018. Error bars represent the standard error of the mean. See Table S1 for the list of countries in each bin.

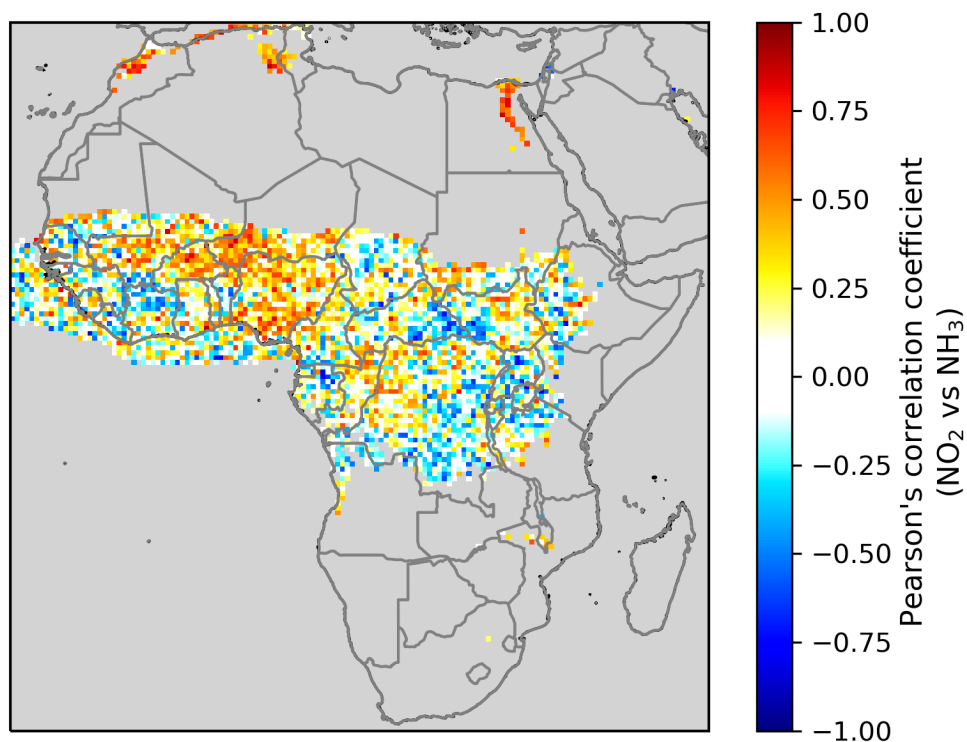

**Figure S20.** Correlation between mean annual  $\text{NH}_3$  and  $\text{NO}_2$  VCDs over Africa for the period 2008 through 2018. Pixels where mean annual  $\text{NH}_3$  VCDs are below  $5 \times 10^{15}$  molecules  $\text{cm}^{-2}$  for all years are masked.



**Table S1.** List of countries in Low, Medium, and High bins in Figure 8.

| Low bin        | Medium Bin               | High Bin          |
|----------------|--------------------------|-------------------|
| Algeria        | Central African Republic | Angola            |
| Botswana       | Chad                     | Benin             |
| Djibouti       | Cote d'Ivoire            | Burkina Faso      |
| Eritrea        | Guinea                   | Burundi           |
| Ethiopia       | Kenya                    | Cameroon          |
| Gambia         | Lesotho                  | Congo             |
| Guinea-Bissau  | Liberia                  | DRC               |
| Libya          | Mali                     | Egypt             |
| Madagascar     | Mauritania               | Equatorial Guinea |
| Namibia        | Morocco                  | Gabon             |
| Niger          | Mozambique               | Ghana             |
| Somalia        | Senegal                  | Malawi            |
| South Africa   | Sierra Leone             | Nigeria           |
| South Sudan    | Sudan                    | Rwanda            |
| Former Sudan   | Tunisia                  | Tanzania          |
| Eswatini       | Uganda                   | Togo              |
| Western Sahara | Zimbabwe                 | Zambia            |

## References

Global Internal Displacement Monitoring Centre: Global Internal Displacement Database, [online] Available from: <https://www.internal-displacement.org/database/displacement-data>, 2020.

Idris, I.: Livestock and conflict in South Sudan - K4D Helpdesk Report 484, Brighton. [online] Available from: [https://assets.publishing.service.gov.uk/media/5c6abdec40f0b61a22792fd5/484\\_\\_Livestock\\_and\\_Conflict\\_in\\_South\\_Sudan.pdf](https://assets.publishing.service.gov.uk/media/5c6abdec40f0b61a22792fd5/484__Livestock_and_Conflict_in_South_Sudan.pdf), 2018.

Raleigh, C., Linke, A., Hegre, H. and Karlsen, J.: Introducing ACLED: An Armed Conflict Location

and Event Dataset: Special Data Feature, *J. Peace Res.*, 47(5), 651–660,  
doi:<https://doi.org/10.1177/0022343310378914>, 2010.

World Bank: World Bank Open Data, World Bank Open Data [online] Available from:  
<https://www.data.worldbank.org> (Accessed 2 February 2019), 2019
